# Supplementary material for: Antioxidant and Cytoprotective Potential of the Essential Oil Pistacia lentiscus var. chia and Its Major Components Myrcene and α-Pinene
Source: PubMed Central journal article supplement (PMC7830477; doi:10.3390/antiox10010127), 2021-01-18
Supplement: antioxidants-10-00127-s001.pdf [file antioxidants-10-00127-s001.pdf]

# Antioxidant and Cytoprotective Potential of the Essential Oil *Pistacia lentiscus* var. *chia* and Its Major Components Myrcene and $\alpha$ -Pinene

Vasileios Xanthis, Eleni Fitsiou, Georgia-Persephoni Voulgaridou, Athanasios Bogadakis, Katerina Chlichlia, Alex Galanis \* and Aglaia Pappa \*

## Supplementary Material

**Table S1.** The volatile compounds identified in *Pistacia lentiscus* var. *chia* essential oil by GC/MS analysis and their relative percent (%) chromatographic area. Data adapted from [17].

| KRI* | Compounds                      | % Area |
|------|--------------------------------|--------|
| 920  | $\alpha$ -pinene               | 67.71  |
| 976  | myrcene                        | 18.81  |
| 958  | $\beta$ -pinene                | 3.05   |
| 1010 | limonene                       | 0.89   |
| 1086 | linalol                        | 0.73   |
| 934  | camphene                       | 0.70   |
| 1120 | <i>cis</i> -verbenol           | 0.69   |
| 1405 | caryophyllene                  | 0.5    |
| 1113 | pinocarveol                    | 0.32   |
| 1168 | verbenone                      | 0.32   |
| 1094 | $\alpha$ -campholenic aldehyde | 0.26   |
| 937  | verbenene                      | 0.07   |
| 1117 | <i>trans</i> -verbenol         | 0.07   |

\* KRI: Kovats Retention Indices.
